# Supplementary material
Source: ML conference proceedings conference paper supplement (https://openaccess.thecvf.com/content/ICCV2021/html/Chen_Self-Supervised_Transfer_Learning_ICCV_2021_paper.html)
Supplement: Supplementary file 2 [file Chen_Self-Supervised_Transfer_Learning_ICCV_2021_supplemental.zip]

Archive with 4 entries (3 files):
- 07210-supp/
- 07210-supp/07210-supp.pdf
- 07210-supp/OUR_REAL_DATASET.mp4
- 07210-supp/STB_DATASET.mp4
